# 1 **Understanding the barriers to pooled SARS-CoV-2 testing in the United** 2 **States**

3

4 Eli P. Fenichel, Ph.D<sup>1</sup>, Anna Gilbert, Ph.D<sup>2,3</sup>, Gregg Gonsalves, Ph.D<sup>4</sup>, and Anne L. Wyllie,  
5 Ph.D<sup>4\*</sup>

6

7 <sup>1</sup> Yale School of the Environment, 195 Prospect St. New Haven, CT, 06511

8 <sup>2</sup> Department of Mathematics, Yale University, 10 Hillhouse Avenue, New Haven, CT, 06511,

9 <sup>3</sup> Department of Statistics & Data Science, Yale University, 10 Hillhouse Avenue, New Haven, CT, 06511

10 <sup>4</sup> Department of Epidemiology of Microbial Diseases, Yale School of Public Health, 60 College St, New  
11 Haven, CT 06510

12

13 Corresponding author: Anne Wyllie, [anne.wyllie@yale.edu](mailto:anne.wyllie@yale.edu), 203-781-6942

14

15 Word count:1196

16

## 17 **Abstract**

18 Pooled testing for SARS-CoV-2 detection is instrumental for increasing test capacity while  
19 decreasing test cost, key factors for sustainable, long-term surveillance measures. While  
20 numerous pooled approaches have been described, uptake by labs has been limited. We  
21 surveyed 90 US labs to understand the barriers to implementing pooled testing.

22

23

24

25 Early in the pandemic testing for SARS-CoV-2 emerged as an Achilles' heel of the United  
26 States' national response (1). The failure to scale-up testing programs rapidly, delays in test  
27 processing and return of results led to delays downstream in self-isolation, diagnosis and  
28 treatment, undercounting of infections, fear and confusion. Proposals for novel strategies  
29 involved pooling of samples from multiple individuals into one testing run. Many countries,  
30 including Israel, Germany, South Korea and China, rapidly implemented pooling as part of  
31 national plans. The US never implemented pooling as part of its own strategy in earnest (2).  
32 According to Google Scholar, over 10,000 papers with key words "COVID" and "pooling" were  
33 'published' in 2020. Pooling samples to increase throughput is not a new idea (3). For most  
34 realistic test positive levels even simple pooling designs greatly increase capacity (4). So, why  
35 has pooled testing been so rare in the US? To resolve this question, we explored the barriers  
36 facing labs to expand testing capacity.

37  
38 On December 9, 2020, we invited 362 labs that had contacted the Yale School of Public Health  
39 expressing interest in implementing the SalviaDirect test (5), to participate in a survey to  
40 evaluate testing constraints and pooling strategies for SARS-CoV-2 testing. The survey was  
41 distributed using Qualtrics and three reminders were sent. The survey closed on January 21,  
42 2021. Of the 93 responses received (25.7% response rate), 90 responses were from CLIA  
43 certified labs conducting SARS-CoV-2 testing. The remaining three were excluded from the  
44 analyses. Nearly half of the labs responding were for profit (n=42), followed by university  
45 affiliated labs (n=9), with the remainder made up by community, non-profit, and government  
46 laboratories. The respondent labs reported serving a variety of testing populations, the bulk  
47 consisting of outpatient and community testing. While most conducted diagnostic testing, many  
48 labs reported testing also for general surveillance and screening for specific events. The high  
49 reporting of diagnostic testing, which is likely representative across all CLIA labs, is important in

50 the context of pooling, which differs from testing for screening and surveillance at the population  
51 scale.

52  
53 The survey included an open-ended question about the barriers to pooling. A major common  
54 barrier to the implementation of pooling by labs was a lack of methods accepted by the  
55 necessary authorities, including the FDA, CLIA regulations or their own laboratory directors.  
56 Reports of a lack of clear protocols and guidance on the methodology for pooled testing  
57 contributed to this. Many labs expressed that even if protocols were available, a lack of time and  
58 resources limited their ability to validate these in-house, preventing proof-of-concept  
59 implementation. Thus, demonstration of the effectiveness of pooling in their setting is lacking. In  
60 that regard, numerous labs reported that local case-positivity rates were simply too high to  
61 warrant pooling, despite recent lab-based data demonstrating the benefit of pooling five  
62 samples up to a ~30% test positive rate (4). Throughout, there were a substantial number of  
63 concerns about the effect of pooling on the sensitivity of detection and the increased risk for  
64 false negative results due to sample dilution.

65  
66 Operational and administrative barriers were also a common theme. Labs frequently reported  
67 that reflex testing of the most common Dorfman approach (3), where samples from positive  
68 pools are re-visited for individual re-testing, are too logistically difficult to manage or too  
69 resource demanding. Labs viewed the need to re-visit samples of positive pools as disruptive to  
70 the standard testing flow and staffing practices, expressing concerns that this would add to the  
71 time of reporting out positive tests. A major concern was the additional logistics required for  
72 following samples through the pooled testing process and the lack of the necessary software to  
73 track samples through the workflow. Important to any testing program were concerns regarding  
74 reimbursement and billing when samples are tested in pools as well as contract obligations.  
75 Limited staff to dedicate to tackling these issues came up repeatedly.

76

77 Survey responses demonstrated that the SARS-CoV-2 testing environment in the US is highly  
78 heterogeneous, particularly in regards to the supplies, testing platforms and the variety of  
79 sample types received. While a majority of labs use 96-well PCR instruments, 384-well  
80 instruments are also common, with some labs reporting non-standard plate sizes in upstream  
81 processes. Many labs utilize multiple instruments in their testing procedures, which can vary in  
82 the number of samples each can process. These inter-lab variations in testing workflows are  
83 important for pooled testing strategies: a protocol developed for one lab may not be easily  
84 translated into another. Those developing pooled testing strategies need to recognize that labs  
85 are working with fixed physical and human capital constraints, and that new labs are not being  
86 built around pooling strategies, such constraints cannot be assumed away.

87

88 Higher test throughput, lower costs per test, and faster turnaround times are all margins for  
89 testing improvement. Increasing the number of samples per test in a pooling structure can be  
90 part of that solution. Laboratories using an extraction process report that it takes on average 4.6  
91 hours to test a sample from start to finish (extraction-less = 3.0 hours), but there is substantial  
92 variation (Figure 1). The small number of labs (n=6) in our sample that engage in pooling  
93 reported total testing time inline with these figures. On average samples wait in labs for 93  
94 minutes prior to extraction-less workflows and 279 minutes prior to extraction-based tests. The  
95 average time to set-up and run PCR is 94 minutes, with little difference between labs. For labs  
96 performing full RNA extraction, this process takes on average 57 minutes. Reset or cycle times  
97 between processes are on average 18 minutes for extraction and PCR. These times are one  
98 motivation for laboratories focused on faster turn around to be wary of designs that require  
99 retesting of samples, which can add hours to the process.

100

101 The need for testing will remain for the years to come. Pooled testing offers sustainable  
102 surveillance measures that support long term programs, essential for the early detection of virus  
103 resurgence or the emergence of variants of concern. While testing programs can be maintained  
104 by pooled PCR testing, labs require guidance on how to transition from traditional diagnostic  
105 testing to pooled surveillance. Importantly, our survey suggests that the major barriers to uptake  
106 and implementation of pooled testing in the US may not simply be the number of tests a lab can  
107 process per day, rather it is the lack of adequate resources guidance on clinical best practices  
108 to transition to pooling. Additionally, a number of labs did not feel that pooled testing was  
109 necessary given current testing capacity constraints at present. If the appropriate resources  
110 were made available however, labs reported that even with current non-pooled testing  
111 strategies, they could on average already increase testing capacity by 60%. While labs need to  
112 see more evidence supporting the ability of pooled testing strategies to successfully move from  
113 theory to a reliable and resource-savings laboratory practice, logistical solutions to support  
114 implementation and general processing remain vital. Responses to our survey highlight the  
115 importance of consulting end-users, those that solutions are being designed for, so challenges  
116 can be crafted to meet the specific needs out in the field. It may be surprising to those designing  
117 pooling strategies to learn that labs view pooling as more time consuming, delaying test  
118 reporting.

119

120

## 121 **References**

- 122 1. Schneider EC. Failing the Test - The Tragic Data Gap Undermining the U.S. Pandemic  
123 Response. *N Engl J Med*. 2020 Jul 23;383(4):299–302.
- 124 2. Wu KJ. Why Pooled Testing for the Coronavirus Isn't Working in America. *The New York*  
125 *Times* [Internet]. 2020 Aug 18 [cited 2021 Feb 21]; Available from:  
126 <https://www.nytimes.com/2020/08/18/health/coronavirus-pool-testing.html>

- 127 3. Dorfman R. The Detection of Defective Members of Large Populations. *Ann Math Stat.*  
128 1943;14(4):436–40.
- 129 4. Watkins A, Fenichel E, Weinberger D, Vogels CBF, Brackney D, Casanovas-Massana A, et  
130 al. Increasing SARS-CoV-2 Testing Capacity with Pooled Saliva Samples. *Emerging*  
131 *Infectious Disease journal* [Internet]. 2021;27(4). Available from:  
132 [https://wwwnc.cdc.gov/eid/article/27/4/20-4200\\_article](https://wwwnc.cdc.gov/eid/article/27/4/20-4200_article)
- 133 5. Vogels CBF, Watkins AE, Harden CA, Brackney DE, Shafer J, Wang J, et al. SalivaDirect:  
134 A Simplified and Flexible Platform to Enhance SARS-CoV-2 Testing Capacity. *Med*  
135 [Internet]. 2020 Dec 26; Available from:  
136 <http://www.sciencedirect.com/science/article/pii/S2666634020300763>  
137

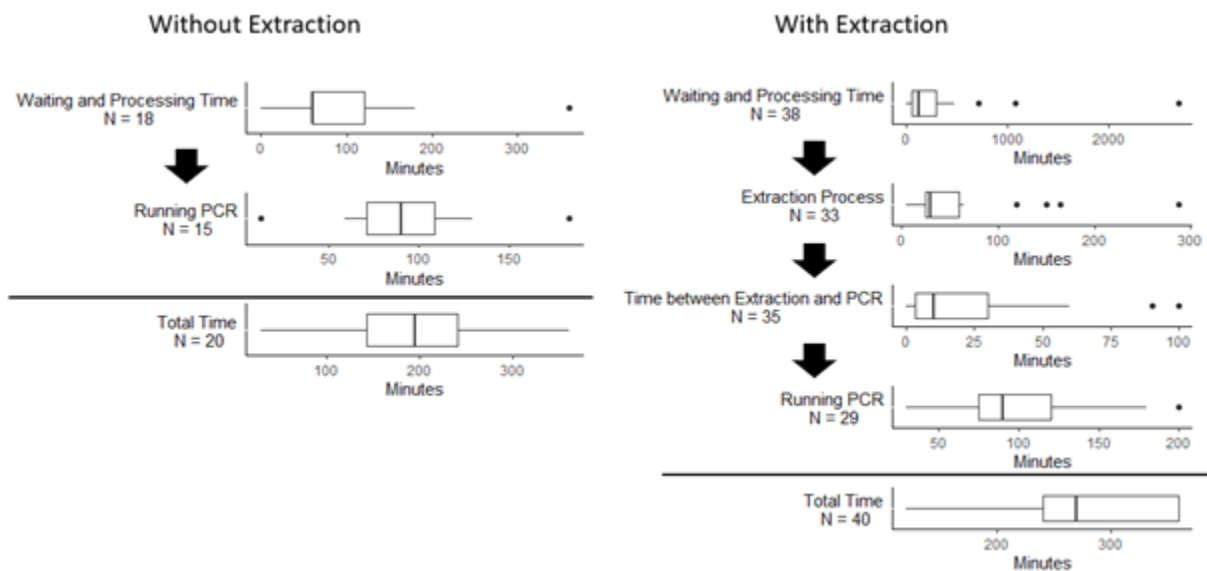

138  
139 **Figure 1.** The variation in timing constraints for critical steps of SARS-CoV-2 testing workflows  
140 with or without RNA extraction.

141
